# Supplementary material for: Polydiacetylene/copolymer sensors to detect lung cancer breath volatile organic compounds
Source: Royal Society of Chemistry journal article supplement (doi:10.1039/d4lp00199k), 2024-01-01
Supplement: d4lp00199k1.pdf [file d4lp00199k1.pdf]

## **Supporting Information**

### **Polydiacetylene/copolymer sensors to detect lung cancer breath volatile organic compounds**

Angie Davina Tjandra and Rona Chandrawati\*

School of Chemical Engineering and Australian Centre for Nanomedicine (ACN), The  
University of New South Wales (UNSW Sydney), Sydney NSW 2052, Australia

\* E-mail: [rona.chandrawati@unsw.edu.au](mailto:rona.chandrawati@unsw.edu.au)

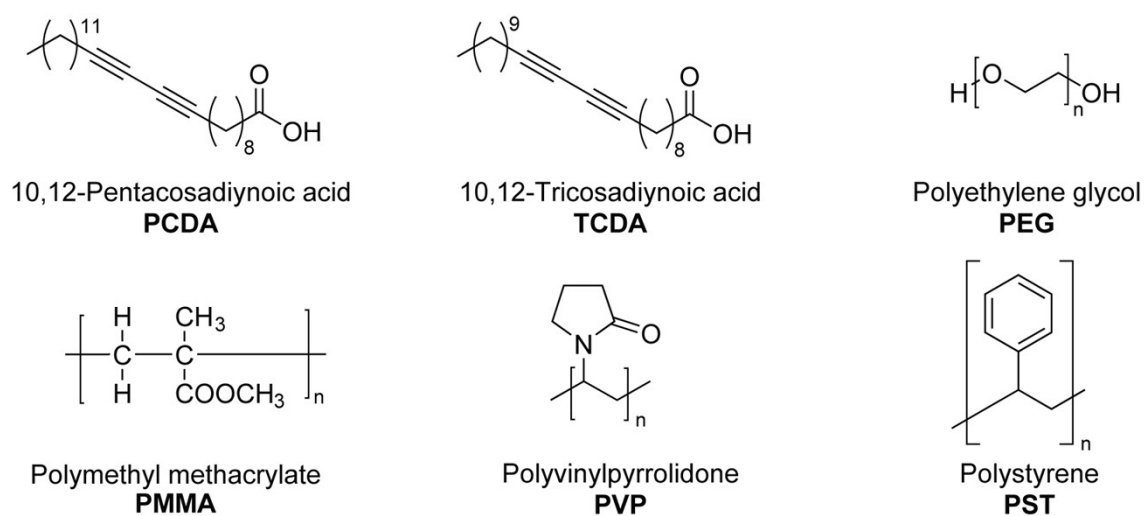

**Figure S1:** Chemical structures of DA monomers and the copolymers investigated in this study.

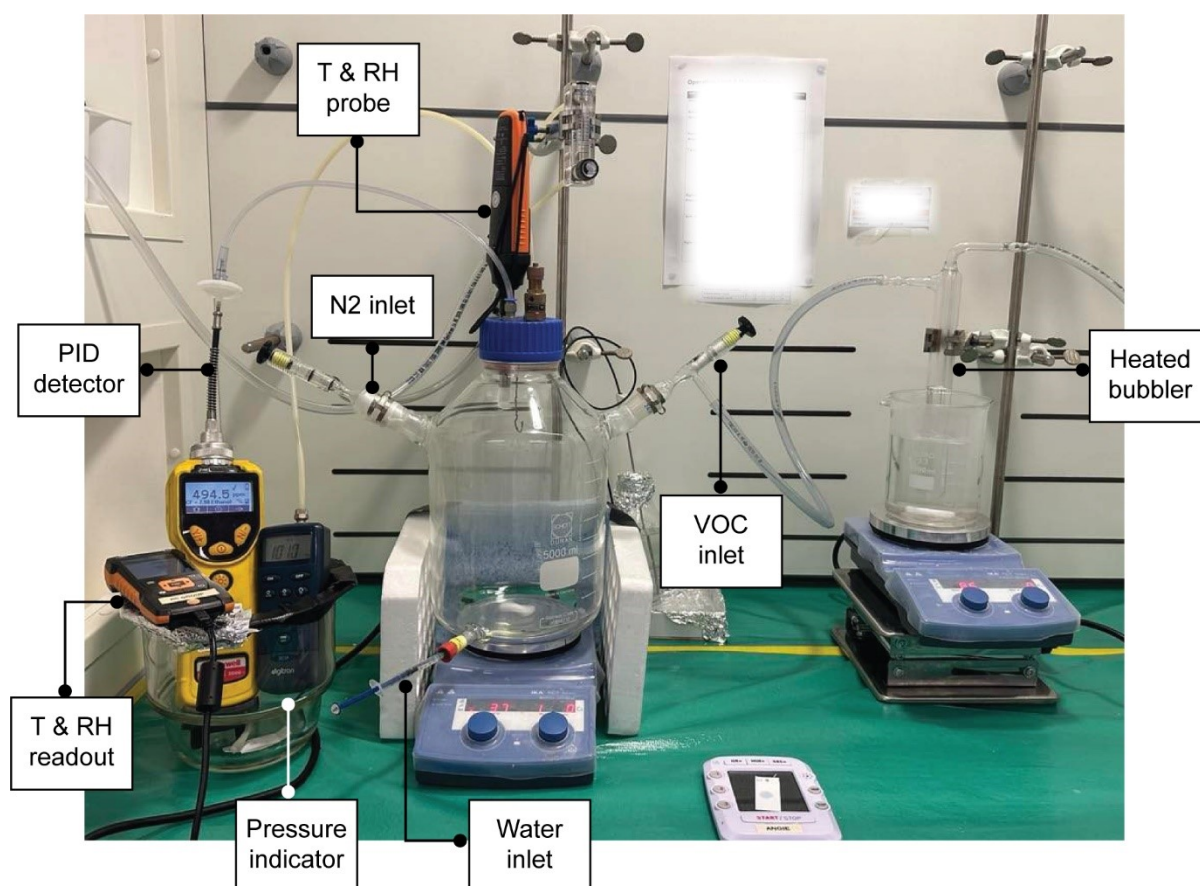

**Figure S2:** Experimental setup for VOC sensitivity testing. Paper sensors are suspended in a pre-conditioned custom-built reactor. Temperature and RH are monitored using an in-built probe and controlled by adjusting the hotplate and injecting water through the bottom inlet. VOC dosing is done using a bubbler filled with the VOC solvent. Nitrogen gas is used as a carrier gas.

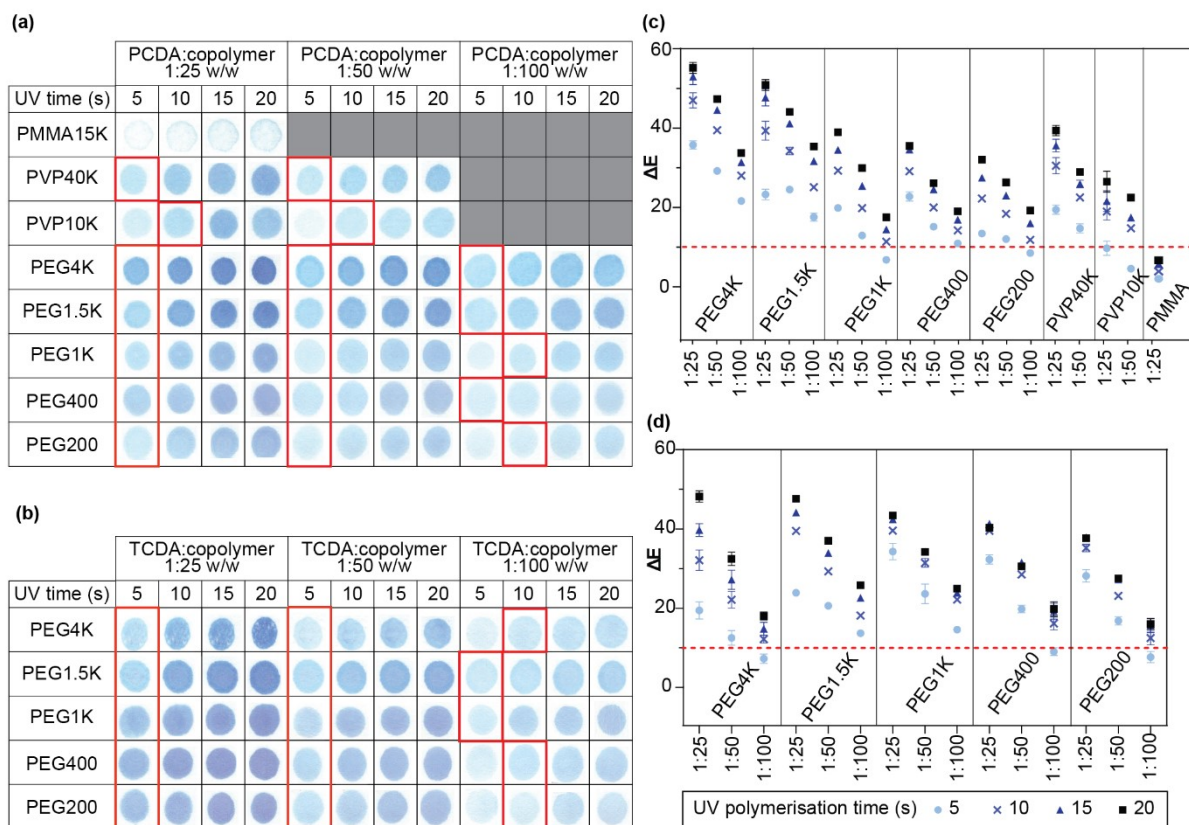

**Figure S3:** The blue intensity of (a) PCDA/copolymer and (b) TCDA/copolymer sensors with different weight ratios after 5 – 20 seconds of UV polymerization. The corresponding  $\Delta E$  values are shown in c-d. The dashed magenta line at  $\Delta E = 10$  marks the value when color change can be seen via the naked eye. Grey boxes indicate no blue PDA was formed. PDA/PST was not formed in all formulations and hence, the whole row is excluded. The red border indicates the selected UV time. ( $n=3$ , error bars represent standard deviation).

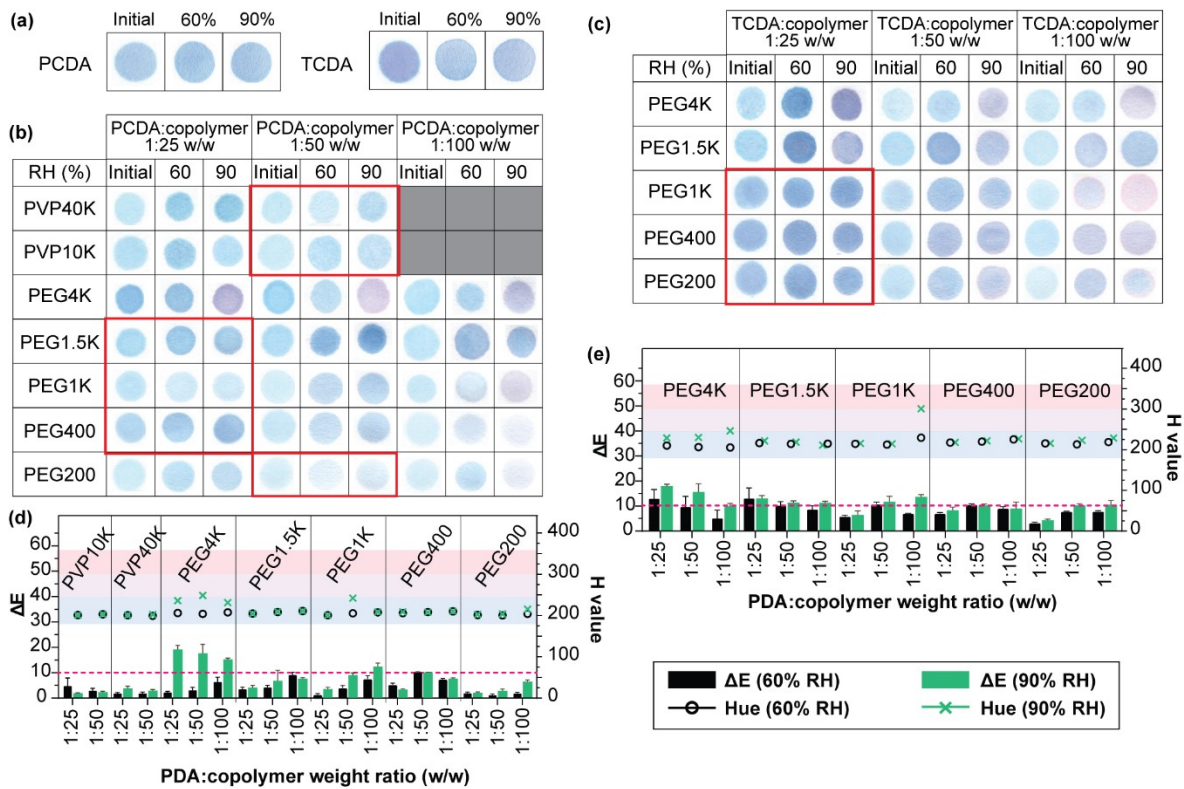

**Figure S4:** Colorimetric responses of (a) control PCDA and TCDA without copolymer, (b) PCDA/copolymer, and (c) TCDA/copolymer sensors after 30 minutes of exposure to standard breath temperature and relative humidity (35 °C and 60% RH or 90% RH), and (d-e) their  $\Delta E$  and H values. The blue, purple and red sections highlight the H value where PDA is of that color. The dashed magenta line at  $\Delta E = 10$  marks the value when color change can be seen via the naked eye. Grey boxes indicate no blue PDA was formed. The red border indicates the selected formulation for further testing. ( $n=3$ , error bars represent standard deviation).

**Table S1:** Hildebrand solubility parameter ( $\delta_{\text{hild}}$ ), dispersion bond ( $\delta_{\text{d}}$ ), polar bond ( $\delta_{\text{p}}$ ), and hydrogen bond ( $\delta_{\text{h}}$ ) values ( $\text{MPa}^{0.5}$ ) of the copolymers tested in this study and the VOCs.

| <b>Chemical</b>                  | <b>Type</b> | <b><math>\delta_{\text{hild}}</math></b> | <b><math>\delta_{\text{d}}</math></b> | <b><math>\delta_{\text{p}}</math></b> | <b><math>\delta_{\text{h}}</math></b> |
|----------------------------------|-------------|------------------------------------------|---------------------------------------|---------------------------------------|---------------------------------------|
| Undecane                         | VOC         | 14.6                                     | 16                                    | 0                                     | 0                                     |
| Isoprene                         | VOC         | 15.1                                     | 14.8                                  | 2.8                                   | 5.6                                   |
| Ethylbenzene                     | VOC         | 17.9                                     | 17.8                                  | 0.6                                   | 1.4                                   |
| 2-butanone                       | VOC         | 19.1                                     | 16                                    | 9                                     | 5.1                                   |
| 2-ethylhexanol                   | VOC         | 19.4                                     | 15.9                                  | 3.3                                   | 11.8                                  |
| Acetone                          | VOC         | 20.3                                     | 15.5                                  | 10.4                                  | 7                                     |
| Poly(ethylene glycol) (PEG)      | Polymer     | 20.7                                     | 17                                    | 10.5                                  | 5.5                                   |
| Polyvinylpyrrolidone (PVP)       | Polymer     | 22.2                                     | 15.5                                  | 11.7                                  | 8.6                                   |
| Hexanal                          | VOC         | 22.3                                     | 15.8                                  | 8.4                                   | 5.3                                   |
| Poly(methyl methacrylate) (PMMA) | Polymer     | 22.7                                     | 18.6                                  | 10.5                                  | 7.5                                   |
| Polystyrene (PST)                | Polymer     | 23.9                                     | 22.8                                  | 5.8                                   | 4.3                                   |
| Ethanol                          | VOC         | 26.0                                     | 15.8                                  | 8.8                                   | 19.4                                  |

**Table S2:** Hildebrand solubility parameter ( $\delta_{\text{hild}}$ ) differences ( $\text{MPa}^{0.5}$ ) between the copolymers and the VOCs (difference =  $\delta_{\text{hild}}$  copolymer –  $\delta_{\text{hild}}$  VOC).

| <b>VOC</b>     | <b><math>\delta_{\text{hild}}</math> difference</b> |            |
|----------------|-----------------------------------------------------|------------|
|                | <b>PEG</b>                                          | <b>PVP</b> |
| Undecane       | 6.1                                                 | 7.6        |
| Isoprene       | 5.6                                                 | 7.1        |
| Ethylbenzene   | 2.8                                                 | 4.3        |
| 2-butanone     | 1.6                                                 | 3.1        |
| 2-ethylhexanol | 1.3                                                 | 2.8        |
| Acetone        | 0.4                                                 | 1.9        |
| Hexanal        | -1.6                                                | -0.1       |
| Ethanol        | -5.3                                                | -3.8       |

**Table S3:** Selected lung cancer breath VOC biomarkers and their LC and healthy concentration range in the breath. Sensitivity (SST) is the ability to distinguish true positives in a population with disease. Specificity (SPC) is the ability to detect healthy subjects in a population without the disease of interest.

| VOC                      | Patient range                                                                                                 | Healthy range                                                   | SST (%)                              | SPC (%)                                                                      | Ref        |
|--------------------------|---------------------------------------------------------------------------------------------------------------|-----------------------------------------------------------------|--------------------------------------|------------------------------------------------------------------------------|------------|
| <b>2-butanone</b>        | 1.78 – 8.38 nmol/L <sup>1</sup><br>3.8 – 38.8 ppb <sup>2</sup>                                                | 0.45 – 2.34 nmol/L <sup>1</sup><br>1.35 – 3.18 ppb <sup>3</sup> | 93                                   | 92.7                                                                         | 1-7        |
| <b>2-ethyl-1-hexanol</b> | Unknown                                                                                                       | Unknown                                                         | Unknown                              | 98 <sup>8</sup>                                                              | 4,8,9      |
| <b>Ethylbenzene</b>      | 13.6 – 32.6 x 10 <sup>-12</sup> M <sup>10</sup><br>4.6 – 89.3 ppb <sup>2</sup><br>110 – 180 ppb <sup>11</sup> | 10.8 – 15.1 x 10 <sup>-12</sup> M <sup>10</sup>                 | 100                                  | 81                                                                           | 2,10-12    |
| <b>Hexanal</b>           | 3.8 – 5.3 ppb <sup>2</sup><br>26.6 – 57.7 ppb <sup>13</sup>                                                   | 0 ppb <sup>2</sup><br>7.0 – 13.8 ppb <sup>13</sup>              | 100 <sup>14</sup><br>74 <sup>9</sup> | 71.7 <sup>14</sup><br>73 <sup>9</sup><br>100 <sup>2</sup><br>94 <sup>8</sup> | 2,4,12,13  |
| <b>Undecane</b>          | 20 – 28 ppb <sup>11</sup><br>0.08 – 4.50 ppb <sup>12</sup>                                                    | Unknown                                                         | 100 <sup>14</sup><br>80 <sup>7</sup> | 81 <sup>14</sup>                                                             | 4,11,12,14 |

**Table S4:** Qualitative representation of the change in  $\Delta E$  values after VOC exposure at 60% RH and 90% RH when compared to its corresponding PDA control (i.e.: without copolymer). Reference signal is from Figure 2. Nominal categorization was done to better visualize the effect of copolymer addition on VOC response. (^) increase, (v) decrease, (-) insignificant or no change. VOCs abbreviation is 2-butanone (2BT), 2-ethylhexanol (2EH), ethylbenzene (EBZ), acetone (ACE), hexanal (HEX), undecane (UND), ethanol (ETH), and isoprene (IPR).

| 60% RH     |            |            |             |           |            |            |           |            |            |
|------------|------------|------------|-------------|-----------|------------|------------|-----------|------------|------------|
| VOC        | PCDA       |            |             |           |            | TCDA       |           |            |            |
|            | PVP10<br>K | PVP40<br>K | PEG1.5<br>K | PEG1<br>K | PEG40<br>0 | PEG20<br>0 | PEG1<br>K | PEG40<br>0 | PEG20<br>0 |
| <b>2BT</b> | ^          | ^          | ^^          | ^         | -          | -          | ^^        | ^^         | ^^         |
| <b>2EH</b> | ^          | ^          | ^^          | ^         | ^          | ^          | ^^        | ^^         | ^^         |
| <b>EBZ</b> | ^          | ^          | ^^          | ^^        | ^          | ^          | ^^        | ^^         | ^^         |
| <b>ACE</b> | ^          | -          | ^           | ^         | v          | -          | ^         | v          | v          |
| <b>HEX</b> | ^          | ^          | ^           | ^         | ^          | v          | ^         | v          | ^^         |
| <b>UND</b> | ^          | ^          | ^^          | ^         | ^          | ^          | ^^        | ^          | ^          |
| <b>ETH</b> | ^          | ^          | ^^          | ^         | ^          | ^          | ^^        | ^^         | ^^         |
| <b>IPR</b> | -          | ^^         | ^           | -         | -          | -          | ^^        | ^          | ^          |

  

| 90% RH     |            |            |             |           |            |            |           |            |            |
|------------|------------|------------|-------------|-----------|------------|------------|-----------|------------|------------|
| VOC        | PCDA       |            |             |           |            | TCDA       |           |            |            |
|            | PVP10<br>K | PVP40<br>K | PEG1.5<br>K | PEG1<br>K | PEG40<br>0 | PEG20<br>0 | PEG1<br>K | PEG40<br>0 | PEG20<br>0 |
| <b>2BT</b> | ^          | ^          | ^^          | ^^        | ^^         | -          | ^^        | ^^         | ^^         |
| <b>2EH</b> | ^          | ^^         | ^^          | ^         | ^          | ^          | ^^        | ^^         | ^^         |
| <b>EBZ</b> | ^          | ^          | ^^          | ^         | ^          | ^          | ^^        | ^^         | ^^         |
| <b>ACE</b> | ^          | ^          | ^^          | ^         | ^^         | ^          | ^^        | ^          | ^          |
| <b>HEX</b> | vv         | vv         | vv          | vv        | vv         | vv         | ^         | v          | ^          |
| <b>UND</b> | ^          | ^          | ^^          | ^         | ^          | ^          | ^^        | ^          | ^          |
| <b>ETH</b> | ^          | ^          | ^^          | ^         | ^          | ^          | ^^        | ^^         | ^^         |
| <b>IPR</b> | v          | -          | ^           | -         | v          | v          | ^         | -          | -          |

## References

1. X.-A. Fu, M. Li, R. J. Knipp, M. H. Nantz, M. Bousamra, *Cancer Med.*, 2014, 3, 174-181.
2. A. Ulanowska, T. Kowalkowski, E. Trawińska, B. Buszewski, *J. Breath Res.*, 2011, 5, 046008.
3. B. Buszewski, T. Ligor, T. Jezierski, A. Wenda-Piesik, M. Walczak, J. Rudnicka, *Anal. Bioanal. Chem.*, 2012, 404, 141-146.
4. W. Filipiak, V. Ruzsanyi, P. Mochalski, A. Filipiak, A. Bajtarevic, C. Ager, H. Denz, W. Hilbe, H. Jamnig, M. Hackl, A. Dzien, A. Amann, *J. Breath Res.*, 2012, 6, 036008.
5. Y. Saalberg, H. Bruhns, M. Wolff, *Sensors*, 2017, 17, 210.
6. M. Ligor, T. Ligor, A. Bajtarevic, C. Ager, M. Pienz, M. Klieber, H. Denz, M. Fiegl, W. Hilbe, W. Weiss, P. Lukas, H. Jamnig, M. Hackl, B. Buszewski, W. Miekisch, J. Schubert, A. Amann, *Clin. Chem. Lab. Med.*, 2009, 47, 550-560.
7. A. Bajtarevic, C. Ager, M. Pienz, M. Klieber, K. Schwarz, M. Ligor, T. Ligor, W. Filipiak, H. Denz, M. Fiegl, W. Hilbe, W. Weiss, P. Lukas, H. Jamnig, M. Hackl, A. Haidenberger, B. Buszewski, W. Miekisch, J. Schubert, A. Amann, *BMC Cancer*, 2009, 9, 348.
8. R. Capuano, M. Santonico, G. Pennazza, S. Ghezzi, E. Martinelli, C. Roscioni, G. Lucantoni, G. Galluccio, R. Paolesse, C. Di Natale, A. D'Amico, *Sci. Rep.*, 2015, 5, 16491.
9. J. Rudnicka, T. Kowalkowski, B. Buszewski, *Lung Cancer*, 2019, 135, 123-129.
10. D. Poli, P. Carbognani, M. Corradi, M. Goldoni, O. Acampa, B. Balbi, L. Bianchi, M. Rusca, A. Mutti, *Respir. Res.*, 2005, 6, 71.
11. M.P. Fernandes, S. Venkatesh, B.G Sudarshan, *Open Biomed. Eng. J.*, 2015, 9, 228-233.
12. P. Mochalski, J. King, M. Klieber, K. Unterkofler, H. Hinterhuber, M. Baumann, A. Amann, *Analyst*, 2013, 138, 2134-2145.
13. D. Poli, M. Goldoni, M. Corradi, O. Acampa, P. Carbognani, E. Internullo, A. Casalini, A. Mutti, *J. Chromatogr. B*, 2010, 878, 2643-2651.
14. M. Phillips, K. Gleeson, J.M.B. Hughes, J. Greenberg, R.N. Cataneo, L. Baker, W.P. McVay, *Lancet*, 1999, 353, 1930-1933.
